# Supplementary material for: Pasiflora proteins are novel core components of the septate junction
Source: Oxford University Press journal article supplement (doi:10.1242/dev.119412), 2015-09-01
Supplement: dev119412supp.pdf [file dev119412supp.pdf]

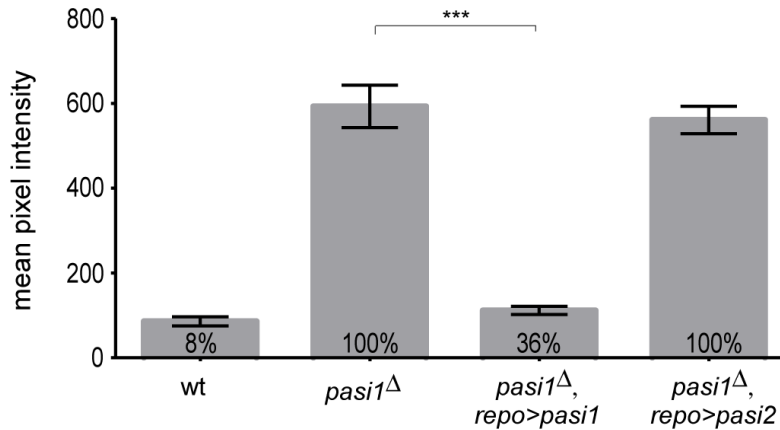

### Supplementary Fig. S1. *pasiflora* genes act non-redundantly during BBB formation.

Quantification of the dye penetration assay in 20 h AEL dye-injected embryos. Pan-glial over-expression of *pasiflora1*, but not *pasiflora2* rescues the dye penetration of *pasiflora1* $\Delta$ . Columns represent intensity of dye penetration into the nerve cord as measured by mean pixel intensity. The percentage of embryos showing penetration is indicated at the bottom of each column. Brackets and asterisks indicate significance of pairwise comparisons. \*\*\*  $p < 0.001$ ,  $\pm$ SEM,  $n = 20-45$ .

## Supplementary Materials and Methods

### Fly strains

The following fly strains were obtained from published sources: *repo-Gal4* (V. Auld), *moody-Gal4* (Schwabe et al., 2005), *tubulin-Gal4* (E. Arama), GFP traps *Nrg*<sup>G00305</sup>, *Lac*<sup>G00044</sup>, and *ATP $\alpha$* <sup>G00109</sup> (W. Chia), *UAS-mCD8-GFP* (L. Luo), *UAS-dicer2* and *UAS-RNAi* lines *pasiflora1*<sup>KK102223</sup>, *pasiflora2*<sup>KK105806</sup>, *pasiflora2*<sup>GD43952</sup>, and *lkb1*<sup>KK108356</sup> (Vienna *Drosophila* Research Center, VDRC, Austria), *Df(3R)BSC566*, *Df(3R)ED5785*, *nrx-IV*<sup>4304</sup>, *nrg*<sup>14</sup>, *kune*<sup>C309</sup>, *cold*<sup>m05607</sup>, *crok*<sup>KG06053a</sup>, *69B-Gal4*, *paired-Gal4* and *breathless-Gal4* (Bloomington *Drosophila* Stock Center, BDSC, Indiana, USA). *w*<sup>1118</sup> was used as wt.

### Immunohistochemistry

Primary antibodies used were: Developmental Studies Hybridoma Bank, DSHB antibodies mouse anti-Repo (8D12), mouse IgM anti-Gasp (2A12), mouse anti-Cora (C615.16), mouse anti-FasIII (7G10), and mouse anti-Crb (Cq4) (all used 1:5), rabbit anti-GFP (A11122, Molecular

Probes, 1:100). Alexa- (Molecular Probes) and Cy- (Jackson ImmunoResearch) conjugated secondary antibodies were used at dilutions of 1:400 and 1:200, respectively.

### **Production of antibodies**

For each protein two 15-16 amino acids-long peptides were synthetically generated and their mixture was injected in rabbit and guinea pig (for Pasiflora1) and hen (for Pasiflora2) (Eurogentec, Seraing, Belgium). The epitopes were: for Pasiflora1: SPLFETDIRSSMPVA, I I W S D N V R T G S Y A V A, and for Pasiflora2: N L H S K M S R S T R S V R I, S T A N S L A G S R P T T P H S. The sera, as well as affinity-purified antibodies were tested by immunostainings in wt embryos in various concentrations (including 1:2).

### **Analysis of FRAP data**

*Image Registration and analysis.* Embryo movements are unavoidable and pose severe challenges for the analysis of time-lapse recordings. We used a home-written *Definiens* script to correct for lateral drift and non-linear distortions of the raw confocal images due to changes of cellular shape. In brief, for a confocal stack of  $n$  images with index  $1..n$ , a *built-in* image registration algorithm was first applied to three reference images with rounded indexes  $n/6$ ,  $n/2$  and  $5n/6$ , respectively (the middle image was used as reference image for registration). The remaining images were then registered with respect to the reference image closest in index number. Given the strong embryo movements and drift that we observed, this strategy ensured a more robust alignment compared to a registration procedure based on only one reference image for the whole stack.

A second *Definiens* script was then used to automatically extract the fluorescence intensity trajectories of the photobleached membrane regions. To detect the photobleached region we applied to registered images a 2D-Gaussian filter with a kernel size of  $5 \times 5 \times 3$  pixels, followed by an edge 3D filter. This filter is sensitive to signal variations between successive time-lapse images, and is thus ideal to detect the photobleached region that exhibits a strong decrease in fluorescence intensity just after the photobleaching step. The average fluorescence intensity in the identified region can then be extracted for each time point, and normalized with

respect to its maximal and minimal values at the time points before and immediately after the photobleaching step, respectively.

*FRAP data analysis.* In a first approximation, the diffusion in the thin photobleached membrane can be modelled by one-dimensional free diffusion. The experimental data were fitted to the empirical formula given in equation (1), which agrees within 5% with the solution of the diffusion equation in one dimension for recovery into an interval of zero intensity (Ellenberg et al., 1997; Ellenberg and Lippincott-Schwartz, 1999)

$$I(t) = I(\text{final}) \left( 1 - \sqrt{\frac{\tau_D}{\tau_D + \pi \cdot (t - t_0)}} \right) \quad (1)$$

with  $I(t)$  = intensity as a function of time;  $t_0$  = time right after photobleaching;  $I(\text{final})$  = final intensity reached after complete recovery;  $\tau_D$  = characteristic time of diffusion.

The fitting procedure was performed using *Origin 8.5*. We kept  $t_0$  constant, and extracted  $I(\text{final})$  and  $\tau_D$  from the fitted curves. Mobile fractions were calculated as ratios of fluorescence intensity in the bleached area after recovery of the signal to fluorescence intensity before photobleaching.

Another common approach used to analyze FRAP recovery curves is the calculation of half-time ( $t_{1/2}$ ) as the time required for the bleached fluorescence to recover to half of its maximum recovery value (Yguerabide et al., 1982; Oshima and Fehon, 2011). We extracted  $t_{1/2}$  from exponential fits of the recovery curves and found for Nrg-GFP  $t_{1/2} = 0.7 \pm 0.1$  minutes,  $1.1 \pm 0.1$  minutes and  $7.6 \pm 5.4$  minutes in *pasiflora1<sup>A</sup>*, *tubulin-Gal4;UAS-pasiflora2-RNAi* and *wt* embryos, respectively. For overexpressed (*paired-Gal4*) Pasiflora1-GFP and Pasiflora2-GFP, we calculated  $t_{1/2} = 0.9 \pm 0.1$  minutes and  $1.9 \pm 0.2$  minutes, respectively, while for the control membrane-bound mCD8-GFP  $t_{1/2} = 11 \pm 1$  seconds. For overexpressed Pasiflora1-GFP and Pasiflora2-GFP in the *kune<sup>C309</sup>* mutant background, we calculated  $t_{1/2} = 18 \pm 2$  and  $16 \pm 0.7$  seconds, respectively. All these values are in the same order of magnitude with both the characteristic times of diffusions  $\tau_D$  calculated using a one-dimensional free diffusion model and the results

obtained by Oshima and Fehon., 2011. Minor quantitative differences between our results and those of Oshima and Fehon (e.g. mobile fractions of mCD8-GFP) might result from the usage of different drivers (*paired-Gal4* vs *engrailed-Gal4*) and pipelines of data analysis.

Furthermore, a puzzling observation is that our recovery curves exhibit I(final) values in the range of 40-60%, whereas values close to 100% would be expected from full recovery of diffusing GFP-tagged proteins. This reveals the presence of an immobile or extremely slow fraction of diffusing GFP-tagged proteins within our observation time. The presence of such an immobile SJ fraction has also been observed before (Laval et al., 2008; Oshima and Fehon, 2011), but its nature remains largely obscure. One of the factors contributing to the two distinct populations of diffusing proteins may lie in the genetics. *pasiflora1* is studied in zygotic mutant embryos although the gene is also maternally expressed and *pasiflora2* by RNAi; these incomplete loss of function conditions contribute to the broader distribution of fluorescence recovery times. However, more surprisingly, partial recovery is also observed for the membrane-bound mCD8-GFP, suggesting the existence of additional sources of traps for the proteins. One possibility is that at early stages, before fully stable insulating SJ complexes have formed, SJs already operate as a fence limiting free mobility within the plane of the membrane, thus hindering diffusion of a fraction of the GFP-tagged proteins.

### Supplementary references

**Ellenberg, J., and Lippincott-Schwartz, J.** (1999). Dynamics and mobility of nuclear envelope proteins in interphase and mitotic cells revealed by green fluorescent protein chimeras. *Methods* **19**, 362-372.

**Ellenberg, J., Siggia, E.D., Moreira, J.E., Smith, C.L., Presley, J.F., Worman, H.J., and Lippincott-Schwartz, J.** (1997). Nuclear membrane dynamics and reassembly in living cells: targeting of an inner nuclear membrane protein in interphase and mitosis. *The Journal of cell biology* **138**, 1193-1206.

**Laval, M., Bel, C., and Faivre-Sarrailh, C.** (2008). The lateral mobility of cell adhesion molecules is highly restricted at septate junctions in *Drosophila*. *BMC cell biology* **9**, 38.

**Oshima, K., and Fehon, R.G. (2011).** Analysis of protein dynamics within the septate junction reveals a highly stable core protein complex that does not include the basolateral polarity protein Discs large. *Journal of cell science* **124**, 2861-2871.

**Yguerabide, J., Schmidt, J.A., and Yguerabide, E.E. (1982).** Lateral mobility in membranes as detected by fluorescence recovery after photobleaching. *Biophysical journal* **40**, 69-75.

### Protein sequences of *Pasiflora* orthologs and paralogs

>gi|23170782|gb|AAN13416.1| CG8121, isoform C [Drosophila melanogaster]  
MMNYGRKTPSTYRSNPSVYSHATGRSSTNLHSKMSRSTRSVRIPWYQRPLLKNNQYIDIQKGAMLVGLFA  
IFLSLFTIATSIFDIYCYAMAAPGSTHYGYIISYEFVYVGNKHVRNMLIVFALFSLIMALINFVTSVLL  
CVALRKEYERKVMPLWSFAIFTVWRALALIFFAIVNDLYFAYNVIMVLLWTIFCVLSIYGWAVVYSLFL  
ELVDLTKLEDLAHLRMGTMASLHASTANSLAGSRPTTPHSTVSTMPVG

>gi|7300307|gb|AAF55468.1| CG7713, isoform A [Drosophila melanogaster]  
MVLSSCWSPIIWSDNVRTGSYAVAGYTAALSAVMITLISYMLAGGESAQLYSPLFETDIRSSMPVAGGF  
FIIYFLLIILSSYLVIYGIKISTRGWLLPWLGLIGLAILFQFSWSLWLIIGGYIYLEQTFSAALLNFVWVA  
YNIYCWLVVFSQYQIFLEIQNPNIELLMF

>gi|7300137|gb|AAF55304.1| CG10311, isoform A [Drosophila melanogaster]  
MPKPLLNSCCLCQSTRNGSVISGILAIIVLSIITIVVIFTTRVHFKTIIIFDFIPNDIVKIIILVINLCMTIL  
ISLLMIIGALKRNHYLMVPPVVLGIMIAIGLLISVIYTGIVFFIDGYVLTGVLWLIIFGLIVCAIMTYCWC  
VVYSEYANLSEENERGRYKQPYRR

>gi|7304157|gb|AAF59194.1| CG12825 [Drosophila melanogaster]  
MWKLDTKGGIICSGCLSI AFAITYLVLMDDYFWKYGLYEMGIHISALQILGSVVLIVGAIKQKHKFFVPW  
MITTGFFLYLMVNLFISLIVQGTAWIFGPLMVVPFTAYLGCALYSVQKAFDRMRKEPPAYASLSDKKEF  
INHI

>gi|7292397|gb|AAF47802.1| fire exit, isoform A [Drosophila melanogaster]  
MLLPTVSGQSAAGCKWKNCCRRSWEMLMAPVSPKNLRTTALLTSIYQLLISHCALFLVLLGLAHAEQMCE  
VLELDILDQKDNDFYNMSPFHNDLRLQTAAQLAVATENLLYVMAGIAGTYALSIFLFFGVFKNRPGLII  
PWLVEFLLMIGLGALVFMLRDTKIVQLLGGQVPYFIICYILICMDYCKWYVMHSFYQSLRTMNKLEIA  
TVAIPCPAPGAIPIYRFQREHMYLGSNGYKHILTESPDGQC

>gi|7303961|gb|AAF59004.1| CG13747 [Drosophila melanogaster]  
MAPNDPSHPGGKSTAVAMATSHTISYVQCQNLKYNVILGWLGVIIISTVILGSSALTIHFRPDIELLLNQ  
WPMNLVPVAEQQLLINLLTIFSSIVYGLSLINMGVSLLLLIGIARDSSCLIYPWLIYHGVIYFGFGLYLG  
FYATAGLFDLSSFLMCLLVFNLVLVIFYKIYHEVFTLFRVMEQLSKDGGMGGLYYQDAEHGWTAAGVPF  
QHVYVPRLLPMQK

>gi|45445476|gb|AAF57628.2| CG15098 [Drosophila melanogaster]  
MLSRVFCMRLNTYGVVIGLWLVILSFLATILLSLALGFVDEIAQQAQKSEDSNKTATEIRSVLIIIVFSV  
YLALKVINLLASAMLVAGTVKERHLLLPWLINNGVLLVFGIITNIAMLAQIIGNTSFLSALPIIFVDVG  
LLLLTWLYYYGIYSLFKQIQASREIQRPLIPQPTQQTNSYPSYTKI

>gi|442630457|ref|NP\_001261455.1| CG13288, isoform C [Drosophila melanogaster]  
MAILESCCFWKDVRSGSFACAIYTLVYFGFSTLMFLFYLIIEEQDFLLGNRAQPLGESLLEKGDVTVVTVI  
FNILLFCSILMVLSSVLLILGLQONKRHLLIPWISFMLGDLLIEVCHLVHLALSRRVKFDPIVGFIFTM  
DFLLCLNLYCLLCVISQYQTFRSQRAEMRLAASTASPIVVFTAAEKLTKAQQQQLHNNLLQQLETGSGY  
GKRRRMLGAASPLITSQRPTNFSTITEEEEEQSQRTDHLTEQPTGEDLGRIPIFTLASSPAHCH

>gi|220902215|gb|AAF58297.3| CG42288, isoform A [Drosophila melanogaster]  
MACRCCKYLKQIFTKCCYCYSLRFGVLLFGCIFLTWFIYITIGTGFMMECIFPNEYQRSLIPAPAALKATM  
VFSFFGIIVSAMLCLGVHNNNEMLFLPFLVFTPIWIIIVHIFALTIVYSFNTIIIIILTVITMLLLVYAWLVV  
WSYYIELLFAYEDELLETGYV

>gi|58380261|ref|XP\_310415.2| AGAP003856-PA [Anopheles gambiae str. PEST]  
MVWLESCWSPFIWTNSVKSYSYAVAAYTVATSIVLITMTTYNLLGGDSSQLYSPLFETDIRDSMQVVGGF  
FILIYFILLILSAGGVCYSLKTTTRGWMLPWLALFGIAILFQVFVGLWLIGGYIYLLQQLSSLILWVWMA  
YNIYCWMCVYSQYQIFENMQSPNIELLMP

>gi|91076134|ref|XP\_970027.1| PREDICTED: uncharacterized protein LOC658556  
[Tribolium castaneum]  
MVILTSCWSPCIWNTDLKTSCKVIAFYTVAMSIIVMTFIVFDMSGGDSTQLYNPLFEADIRYSMQVVGTC  
SMIFFSSLIISTILLVVLGHKMNRMMLPWLIEFGIVVLFQLVFGWLWLLGGYIYLETVLHTFVIWSWMT  
YNGYCWLVVYSQYQVFEEMQSPNIELLWP

>gi|321478715|gb|EFX89672.1| hypothetical protein DAPPUDRAFT\_230163 [Daphnia pulex]  
MPSISTCWSPCFWHMNVREGTFAVAFYTTFFPIVIIAYTAYVMRGGDSAQFYLPYFEADVKDTMQSVGAI  
AILFCLMFIICSFMLVQGVKRYRGLFFPMMICMTLVVLFQAVYGLWIIIGYYILWNVFVSIVNWIWMAA  
NMYFFMVCVWSQYEIVTELQARHIELLYP

>gi|391347330|ref|XP\_003747917.1| PREDICTED: uncharacterized protein  
LOC100898088 [Metaseiulus occidentalis]  
MPILDRCNPLMMYHFTNVRFSGSYCAVYTMVLHIVFIFYAIYAIQGGRTTEWFFSPYFEYSQRGTAAAS  
ITIVLCLIFLFFFTLLCRGVRRDNRMYFPWMMGMTIEILLMIGVGLWYIVRYRNLFSVLAAILLWTID  
GFHIYCLLIVISQYQIVKNLQEPKFEFLYP

>gi|291239765|ref|XP\_002739793.1| PREDICTED: uncharacterized protein  
LOC100371028 [Saccoglossus kowalevskii]  
MYDMAIIVRCCCCNVRTGSIWAASYSLITSLLNGLYAYFTVIYQNMESGYLHIPYIVFPITTGCSGLVF  
MLSIVLIIIGLIMDHKLLLPWIIIFYIFYILAEGATSFVLVFFFGAHAMNLFALAWFVSRITILGVYCIICV  
VSQYQELNEGRGRSYDYERDAYMDDDADAPPETIESPRVMKFTIHGDQTRQYSTASTKSAGDIELEETR  
SYSTRRHPRSPKIVPREVQTPNNGYQNRYPFEDDVV

>gi|291234470|ref|XP\_002737171.1| PREDICTED: lysosomal-associated  
transmembrane protein 4B-like [Saccoglossus kowalevskii]  
MTIITTCCCMNTRTGTIVSGIYTTILAGIRLIMLSALASAGDKAGGLISSYIIDLLLLIGLLIVSIIL  
IYGAIKDNRIILLVPMVMVIFIIILTLITIIIIIVYASFSSWVTWSNIIWFVIFNTINIYCLLCVISQYQ  
ELKEGRGTADYHRQLAASRGRPVVVTTTTTPARVEKA

>gi|780177238|ref|XP\_011661517.1| PREDICTED: uncharacterized protein  
LOC100891165 isoform X2 [Strongylocentrotus purpuratus]  
MAILTRCCCFDNVRTGSKACGVYSLIYCLVSVGILLWEFVDYIEMSSYTGAARKGLYAAYSIDLVLIFL  
FIASIIILLVGVAKNSKMLIPYMAIPLLIVLQLISWIIIVFVFIGMGEVAEHVIDIAQCVVWFVVTAPKI  
LCLICVLSQYQELKDGRRQYNMV

>gi|780170733|ref|XP\_011660511.1| PREDICTED: uncharacterized protein  
LOC105436567 [Strongylocentrotus purpuratus]  
MAIMQSCCCFSNVRSGSLACGVFSLITSCFYLAEGSWNLALAVSVHSNNTGPAIDGTAAYSIDIIVDVV

LLIASIVLLVGVSVNNRTMLIPYMVAIMAVMVLQAITWLIQIVFIGAAYIVLIVILVVWLLYTAFNIMCL  
LCVISQYQELSEGRGRAMQAQWSTPITERSTLVR

>gi|762168016|ref|XP\_011422358.1| PREDICTED: uncharacterized protein  
LOC105324851 [Crassostrea gigas]  
MAIVKTFCLFCNSNTRVGTLICGCYSLVNSLICLVFYLFYFRYVGYQLIEDSQEYKGVYAGFVLYGLMIAASL  
ILIPGVQLDKRYLLLPWVYVLIILNVLYETGSIALLTTVHMEREKTLNAWEIVWMFYCYFKLIANCYCFAC  
VVSQYQELSEGRGTYDLYKPRNRRSMGRAREFDIDTFELPFGVHLPYAESDPCKELNPPLYENLYPQP  
KLEDRRSIDIRQIGLCHNVQTVNQHSERYNYSQRYSGDMPDRYSITVDVVWI

>gi|676473692|ref|XP\_009059901.1| hypothetical protein LOTGIDRAFT\_165135  
[Lottia gigantea]  
MTDWFTSDLIKVISVCLGFYLFYRIALDAISKSIEFKGIIYAGFVLYSLLIAVSLILLPGVYMDKRYLM  
LPWIYVLVVTVLYETGAVALTTVHLEYEKQLQSWEIISVCFYMLRLVANCYCFACVVSQYQELTEGRGT  
YEFYKPKSSSSPSDVEVYTPPFGANLPPYSIEDQHKEFSPPPYDNLSFETESDDVFRATATSACIHGEGRH  
DLLNDISECCAPDVTSRVDYDPEYGVLDAMSGSVLTHPVPEYRLPGIDYQMTTHLTWL

>gi|118789020|ref|XP\_317141.3| AGAP008322-PA [Anopheles gambiae str. PEST]  
MNYGRKTPSTYRSTPSVYSHITSRSQSNLHSQRSRSMKSMVMPWYQKPLLHNNKYLDIQRGAFIMGLFSI  
FVAIFTIGTAVFDIYCLALAAPGSSHYGYIISYEFVYVGNVHVRNALMVAALFSLIGGLVVLVTSIMLV  
HALRKEYESKIVPWLWSFAIFTLFRLLAFLFFSIVNDLIFAYNILITLIWSVIIIVASLYGWL MVYSLYLE  
LADLTKLEDLAHLRMGTMQSLNASVAHSLAGSRPTTPHSTVSTMPVGDTKFI

>gi|91085253|ref|XP\_973335.1| PREDICTED: uncharacterized protein LOC662125  
[Tribolium castaneum]  
MNYGKKSPTTGTSPVYSHVTTSSANLRSSRSIKSLKIPWYRKPIITESYILDVQRSSLLIGVFSLLLSI  
FTVITSCFDLYCYSMAVPGSVHTGYYVISYQFIYVGNRHRVNTLVMFAAFSILLAIGVFTVTSIMLIIALR  
KEYEKKMVPWLYAFGIFTVFRLAYLFFSIVNDMIFAYNVLMCLLWTVFLAISYIGWILVYSLYIELSDL  
TRLEDLAHLRMGTMQSLNASTVPSLAGSRPTTPHSTVSTMPVG

>gi|321478341|gb|EFX89298.1| hypothetical protein DAPPUDRAFT\_126746 [Daphnia  
pulex]  
MSRSMKSLRVAWYKKPILQDAFFTDIQTGSMITAIIFSMVISLFTIATAVLDIYCLGMKPGVTHYGYIIM  
SFQFVYVGNGNVRNTLIVFALFSAIAAVALFVTSCILLKALRKEIEKEMVPWLFASGVFFVWRTIAIIFA  
SVVNDMIFGYHIAMCLFWVAFILLGTLGWVIVYSLYLELSDLTKLEDLAHLRMGTMSLNMSTQSIAGSRP  
TTPHSTVSTAQVV

>gi|391326765|ref|XP\_003737882.1| PREDICTED: uncharacterized protein  
LOC100900661 [Metaseiulus occidentalis]  
MGSRSVLNKTSTIDSSRYRKRQRWYQRRPFLDNAYFTNLQKGSYIAAIYALIECLFMICLVIFDIYCLA  
EAQPGSRHFRYFGISFLFYSGNQHVRNLLITVSVISFIGAMFLLVTSAQIISALRKEQEARFRPWLYSM  
AAFTVWRFCAIIFRSIANDLYYAYHILMLLIWAALIAGNVFAGLVVLSNYQELSDITRLEDLARSKMGGSS  
TSVSRSVSHNSLDTFKNSSVHNSFQSNYSNRSGVPSVSSVPMRQLR
